# Supplementary material for: Baseline gene expression profiling determines long-term benefit to programmed cell death protein 1 axis blockade
Source: PubMed Central journal article supplement (PMC9755314; doi:10.1038/s41698-022-00330-3), 2022-12-15
Supplement: 41698_2022_330_MOESM1_ESM.pdf [file 41698_2022_330_MOESM1_ESM.pdf]

**Supplementary Table 1.** Variability in gene importance as progression-free survival increases.

| GENES     | Gene importance per time period |      |      |      | Linear Coefficient | Correlation Coef |
|-----------|---------------------------------|------|------|------|--------------------|------------------|
|           | 6                               | 12   | 18   | 24   |                    |                  |
| APOL6     | 0                               | 0    | 0    | 0.05 | 243.8549852        | 0.774596669      |
| BAD       | 0                               | 0    | 0.39 | 2    | 7.032438926        | 0.866106631      |
| C2        | 0                               | 0    | 0    | 0.3  | 40.43774145        | 0.774596669      |
| CCL8      | 0.01                            | 0    | 0    | 0    | -1337.566857       | -0.774596669     |
| CD274     | 0                               | 0    | 0    | 0.27 | 44.10806687        | 0.774596669      |
| COL11A1   | 0.02                            | 0    | 0    | 0    | -707.0065004       | -0.774596669     |
| COL17A1   | 0.04                            | 0.04 | 0.05 | 0    | -215.0166777       | -0.641006029     |
| CSF2RB    | 0                               | 0.31 | 0    | 0    | -13.00000897       | -0.25819889      |
| CXCL14    | 0                               | 0    | 0.08 | 0    | 48.14809023        | 0.25819889       |
| CXCL5     | 0                               | 0    | 0    | 0.16 | 74.34345171        | 0.774596669      |
| CXCL8     | 0                               | 0.13 | 0    | 0.5  | 24.74638499        | 0.747701029      |
| CXCL9     | 0.16                            | 0.17 | 0    | 0    | -70.17805493       | -0.873020223     |
| DEFB134   | 0.11                            | 0.27 | 0.15 | 0.69 | 23.02215858        | 0.788294539      |
| EPCAM     | 0                               | 0    | 0.06 | 0    | 71.01903524        | 0.25819889       |
| ERBB2     | 0.01                            | 0.21 | 0    | 0    | -21.91339958       | -0.298467528     |
| F2RL1     | 0                               | 0    | 0.13 | 0.13 | 90.13138793        | 0.879561107      |
| GMIP      | 0                               | 0.07 | 0.07 | 1.15 | 11.32231589        | 0.805782418      |
| GPSM3     | 1.09                            | 0.42 | 0    | 0    | -13.98485964       | -0.92608817      |
| HDAC11    | 0                               | 0    | 0.41 | 0    | 9.866235064        | 0.25819889       |
| HLA.DQA2  | 0                               | 0.08 | 0    | 0.36 | 34.14595715        | 0.755675994      |
| HLA.F     | 0                               | 0.04 | 0    | 1.25 | 9.655014115        | 0.7742974        |
| HMGGA1    | 0                               | 0.11 | 0    | 0.71 | 17.46843941        | 0.764789876      |
| HMGB1     | 0.82                            | 0.71 | 0.51 | 0.84 | -5.55742632        | -0.109432729     |
| HSD11B1   | 0                               | 0.11 | 0    | 0.18 | 55.73236723        | 0.645915414      |
| IDO1      | 0.02                            | 0.02 | 0.12 | 0.61 | 23.67548765        | 0.856416985      |
| IFI35     | 0.14                            | 0    | 0    | 0    | -85.52350429       | -0.774596669     |
| IKBKG     | 0                               | 0    | 0    | 0.07 | 164.9908587        | 0.774596669      |
| IL21R     | 0                               | 0    | 0    | 1.04 | 11.49965847        | 0.774596669      |
| IL2RB     | 0                               | 0    | 0    | 0.14 | 86.73832425        | 0.774596669      |
| ITGA6     | 0.38                            | 0.52 | 0    | 0.05 | -23.40373647       | -0.76906888      |
| LAMB3     | 0                               | 0    | 0    | 0.13 | 95.5620464         | 0.774596669      |
| LDHB      | 0                               | 0.42 | 0    | 0.04 | -7.374081056       | -0.195974812     |
| LGALS9    | 0                               | 0    | 0    | 0.6  | 19.95500461        | 0.774596669      |
| LYZ       | 0.05                            | 0    | 0    | 0.5  | 22.73669487        | 0.719792804      |
| MGMT      | 0.09                            | 0.37 | 0.12 | 0.14 | -5.993771141       | -0.100304208     |
| MICB      | 0                               | 0.09 | 0    | 0.27 | 44.75303873        | 0.733534196      |
| MMP7      | 0                               | 0    | 0.12 | 0.27 | 57.17001008        | 0.938841889      |
| NCAM1     | 0                               | 0    | 0.2  | 0    | 20.09981573        | 0.25819889       |
| NRDE2     | 0                               | 0.09 | 0    | 0    | -46.93148567       | -0.25819889      |
| P4HA2     | 0                               | 0.45 | 0.18 | 1.38 | 10.24733723        | 0.813086266      |
| PCK2      | 0.19                            | 0.23 | 0.4  | 0.18 | 12.1445085         | 0.156942935      |
| PDGFB     | 0.12                            | 0.51 | 0    | 0    | -14.74567988       | -0.458351459     |
| PDZK1IP1  | 0.08                            | 0.12 | 0    | 0    | -103.1539983       | -0.797729833     |
| PIK3CA    | 0                               | 0.27 | 0    | 5.11 | 2.385684604        | 0.773608955      |
| POLD1     | 0.62                            | 0.43 | 0    | 0.18 | -23.47435939       | -0.826375786     |
| PSMB10    | 0.04                            | 0.33 | 0.51 | 1.86 | 8.659488296        | 0.902695752      |
| PVR       | 0                               | 0.11 | 0.66 | 1.61 | 9.980472107        | 0.944592856      |
| RAD51     | 0.41                            | 0    | 0    | 0    | -29.48019352       | -0.774596669     |
| RB1       | 0.94                            | 0.54 | 0    | 1.92 | 3.630884409        | 0.380783038      |
| RNLS      | 0                               | 0.12 | 0    | 0    | -34.32352692       | -0.25819889      |
| RUNX3     | 0                               | 0.06 | 0    | 0.04 | 58.80370779        | 0.228887324      |
| STAT1     | 0                               | 0    | 0    | 0.05 | 246.5239103        | 0.774596669      |
| TLR3      | 0.35                            | 0    | 0    | 0    | -34.56986178       | -0.774596669     |
| TNFRSF11A | 0                               | 0.3  | 0.1  | 0.32 | 30.90655542        | 0.629381378      |
| TNFSF13   | 0                               | 0.03 | 0    | 0    | -147.0636589       | -0.25819889      |
| TSLP      | 0                               | 0.01 | 0    | 0    | -299.0050052       | -0.25819889      |
| WDR76     | 0                               | 0.5  | 0    | 0.46 | 11.44483311        | 0.409192562      |
| WNT5B     | 0.25                            | 0.58 | 0    | 0    | -17.61119724       | -0.62695558      |

| Gene            | Coefficient | Function                                                                       | Signaling pathway                                                      |
|-----------------|-------------|--------------------------------------------------------------------------------|------------------------------------------------------------------------|
| <i>ERBB2</i>    | 0.03154348  | Receptor tyrosine kinase; proliferation and survival                           | Various, including PI3K/Akt and MAPK/ERK                               |
| <i>PIK3CA</i>   | -0.27556654 | Lipid kinase; proliferation and survival                                       | PI3K/Akt                                                               |
| <i>NRDE2</i>    | -0.40016433 | RNA degradation; DNA damage response                                           | NA                                                                     |
| <i>INHBA</i>    | 0.16432095  | Inhibin beta A subunit; tumor suppressor                                       | NA                                                                     |
| <i>MMP7</i>     | 0.01911488  | Degradation of the extracellular matrix; invasion and metastasis               | Wnt/ $\beta$ catenin, TGF- $\beta$                                     |
| <i>P4HA2</i>    | 0.32543580  | Collagen synthesis                                                             | NA                                                                     |
| <i>MYD88</i>    | 0.25137789  | Signal transducer; proinflammatory                                             | Innate immune system; IL-1, TLR, NF- $\kappa$ B                        |
| <i>DEFB134</i>  | 0.34902263  | Defensin; proinflammatory                                                      | Innate immune system                                                   |
| <i>PSMB10</i>   | 0.14860176  | Immunoproteasome; antigen presentation by MHC class I                          | STAT1/STAT3, IFN $\gamma$ ; NF- $\kappa$ B                             |
| <i>HLA.DQA2</i> | 0.18764448  | Antigen presentation by HLA class II                                           | IFN $\gamma$                                                           |
| <i>CXCL8</i>    | -0.26940874 | Chemokine                                                                      | IL-8                                                                   |
| <i>IDO1</i>     | 0.29503052  | Tryptophan catabolism; suppression of T cell proliferation, induction of Tregs | Constitutive (by PI3K/Akt) and inducible (by IFN $\gamma$ ) expression |

**Supplementary Table 2.** Components of the LTB gene signature. LTB, long-term benefit.

**Supplementary Figure 1.** Performance of the LTB signature in the TCGA melanoma dataset. LTB, long-term benefit.

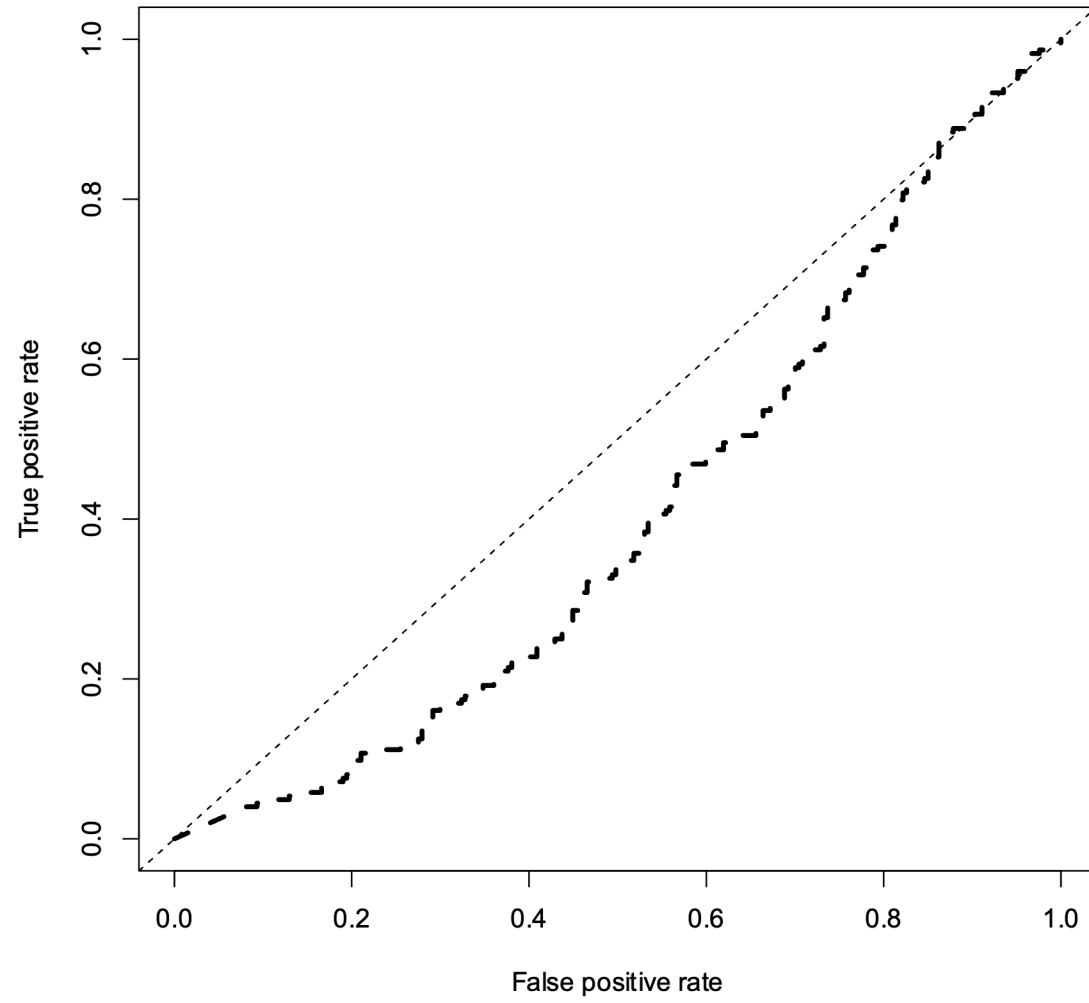

**Supplementary Figure 2.** Performance of the LTB set of 11 out of 12 genes (without HLA.DQA2) in the external validation (Gide et al) dataset. LTB, long-term benefit.

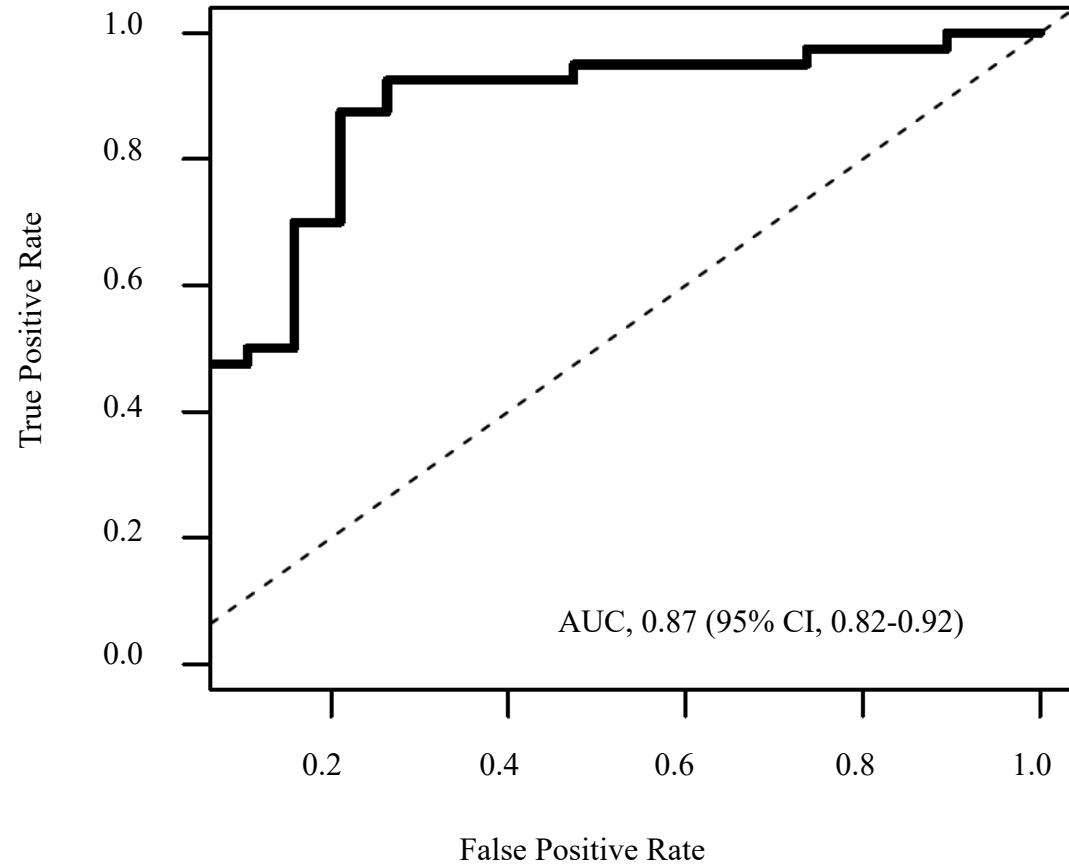

The complete list of genes included in the nCounter PanCancer IO 360™ Panel can be accessed at <https://nanosttring.com/support-documents/io-360-gene-list/>.
